# Supplementary material for: Anti-Melanogenic Effects of Lilium lancifolium Root Extract via Downregulation of PKA/CREB and MAPK/CREB Signaling Pathways in B16F10 Cells
Source: MDPI journal article supplement (doi:10.3390/plants12213666), 2023-10-24

**Figure S1.** Effects of *Lilium lancifolium* (*L. lancifolium*) root extract on melanogenesis-related genes in B16F10 cells. **(A)** B16F10 cells were treated with the indicated concentrations of LRE and  $\alpha$ -MSH for 24 h. mRNA levels of tyrosinase-related genes (*tyrosinase*, *Tyrp1*, and *Tyrp2*) were detected via qRT-PCR, with *Gapdh* serving as a loading control. **(B)** B16F10 cells were seeded in 60-mm dishes ( $2 \times 10^5$  cells) and incubated for 24 h. The cells were treated with the indicated concentrations of LRE and  $\alpha$ -MSH for 24 h. The mRNA levels of *Mitf* were detected via qRT-PCR, with *Gapdh* serving as a loading control. The results are presented as the mean  $\pm$  SD of three independent experiments and were analyzed using a one-way analysis of variance followed by Tukey's test. qRT-PCR, quantitative real-time polymerase chain reaction; mRNA, messenger RNA; *Mitf*, microphthalmia-associated transcription factor. ###, \*\*\*  $p < 0.001$ , \*\*  $p < 0.01$ , \*  $p < 0.05$ .

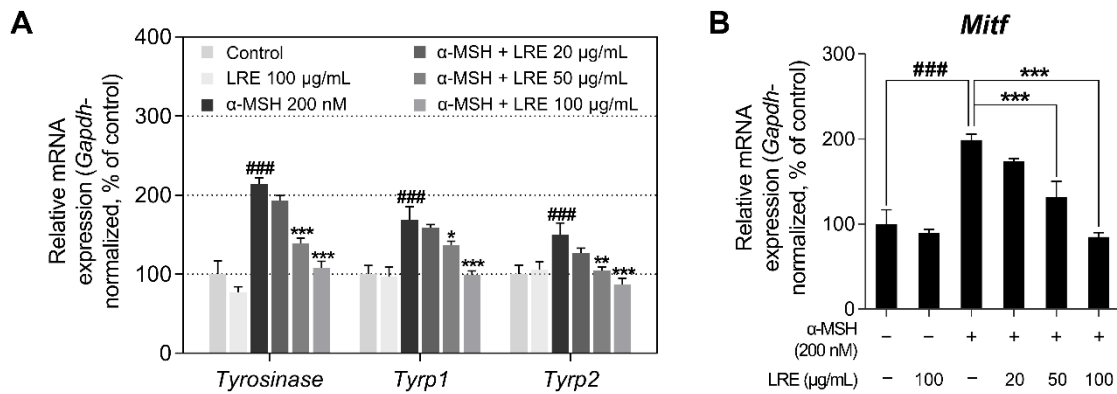

Supplement: s1 [file s1]
